# Supplementary material
Source: Springer Nature journal article supplement (https://www.springermedizin.de/resource/supplementary/12889_2013_7521_MOESM3_ESM.pdf/9498394)

Negative affect

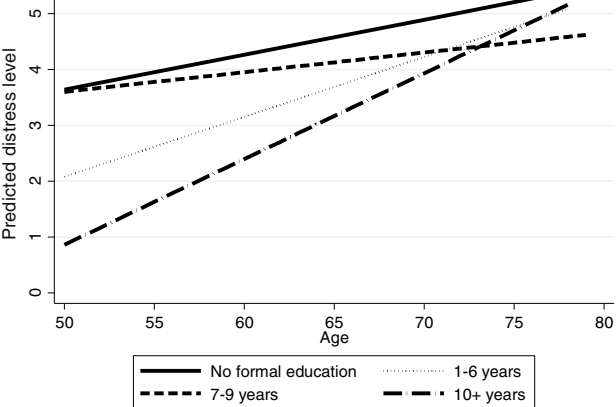

(a)

Lack of positive affect

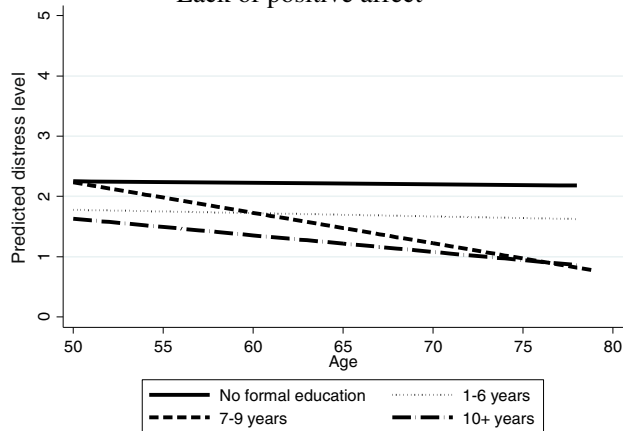

(b)

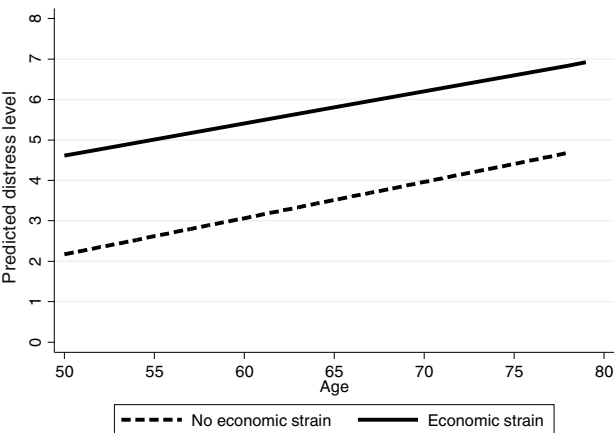

(c)

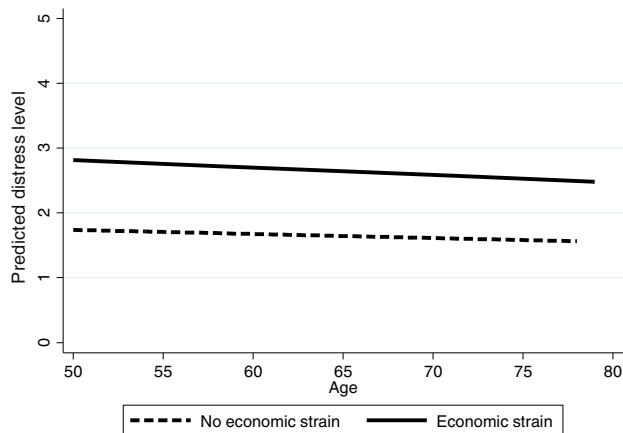

(d)

Supplement: MOESM3 [file 9498394]
